# Supplementary material
Source: Springer Nature journal article supplement (https://www.springermedizin.de/resource/supplementary/12891_2009_785_MOESM1_ESM.pdf/9507006)

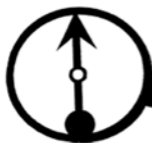

*Inclinometer  
angle  $\alpha$*

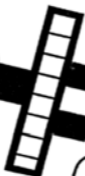

T1  
T2

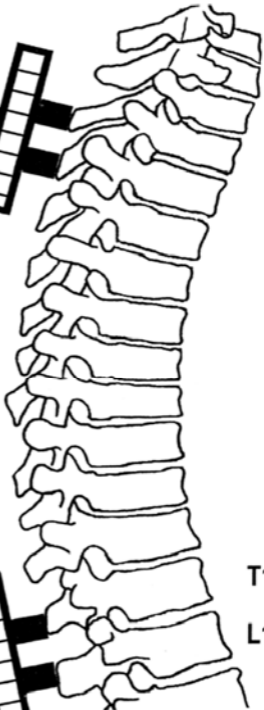

**Kyphosis**

= angle  $\alpha$  + angle  $\beta$

*Inclinometer  
angle  $\beta$*

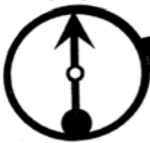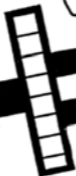

T12  
L1

Supplement: MOESM1 [file 9507006]
